# Supplementary material
Source: PubMed Central journal article supplement (PMC4409152)
Supplement: ismej2014187x1.pdf [file ismej2014187x1.pdf]

**The ISME Journal**

**Supplemental Information**

**Intra- and inter-generic transfer of pathogenicity island-encoded virulence genes by *cos* phages**

John Chen, Nuria Carpena, Nuria Quiles-Puchalt, Geeta Ram, Richard P. Novick, José R Penadés.

**Inventory of Supplemental Information**

Supplementary Table 1. Bacterial strains used in this study.

Supplementary Table 2. Primers used in this study.

Supplementary Figure 1. Replication analysis of SaPI<sub>bov5</sub>  $\Delta$ *cos*.

Supplementary Figure 2. Efficiency of plating of *cos*-phages  $\phi$ 12 and  $\phi$ SLT against various bacterial species.

**Supplementary Table 1. Bacterial strains used in this study.**

| Strains | Description                                         | Reference                           |
|---------|-----------------------------------------------------|-------------------------------------|
| RN4220  | Restriction-defective derivative of RN450           | (Kreiswirth <i>et al.</i> 1983)     |
| JP10435 | RN4220 lysogenic for $\phi$ 12                      | (Quiles-Puchalt <i>et al.</i> 2014) |
| JP11010 | JP10435 SaPIbov5 <i>tetM</i>                        | (Quiles-Puchalt <i>et al.</i> 2014) |
| JP11229 | JP10435 SaPIbov5 <i>tetM</i> $\Delta$ cos site      | (Quiles-Puchalt <i>et al.</i> 2014) |
| JP10924 | RN4220 lysogenic for $\phi$ 12 $\Delta$ <i>terS</i> | This work                           |
| JP11012 | JP10924 SaPIbov5 <i>tetM</i>                        | This work                           |
| LUG1170 | SH1000 $\phi$ SLT                                   | (Labandeira-Rey <i>et al.</i> 2007) |
| JP11194 | LUG1170 SaPIbov5 <i>tetM</i>                        | (Quiles-Puchalt <i>et al.</i> 2014) |
| JP11230 | LUG1170 SaPIbov5 <i>tetM</i> $\Delta$ cos site      | (Quiles-Puchalt <i>et al.</i> 2014) |
| JP830   | <i>S. epidermidis</i>                               | (Maiques <i>et al.</i> 2007)        |
| JP831   | <i>S. epidermidis</i>                               | (Maiques <i>et al.</i> 2007)        |
| JP7422  | <i>L. monocytogenes</i> SK1351                      | (Chen & Novick 2009)                |
| JP7432  | <i>L. monocytogenes</i> EGDe                        | (Chen & Novick 2009)                |
| JP1220  | <i>S. xylosus</i> C2a                               | (Maiques <i>et al.</i> 2007)        |
| JP4226  | DU298 ( <i>S. aureus</i> RN4220 <i>coa::ermC</i> )  | (Viana <i>et al.</i> 2010)          |
| JP11545 | JP829 (SaPIbov5 <i>tst::tetM</i> )                  | This work                           |
| JP11553 | JP830 (SaPIbov5 <i>tst::tetM</i> )                  | This work                           |
| JP11543 | JP7422 (SaPIbov5 <i>tst::tetM</i> )                 | This work                           |
| JP11544 | JP7432 (SaPIbov5 <i>tst::tetM</i> )                 | This work                           |
| JP11542 | JP1220 (SaPIbov5 <i>tst::tetM</i> )                 | This work                           |
| JP11554 | JP4226 (SaPIbov5 <i>tst::tetM</i> )                 | This work                           |
| JP10812 | <i>E. coli</i> DH5 $\alpha$ (pJP1511)               | This work                           |

**Supplementary Table 2. Primers used in this study.**

| PCR         | Oligonucleotides | Sequence (5'-3')                                       |
|-------------|------------------|--------------------------------------------------------|
| Integration | lpr-13mP         | AA <u>ACTGCAGGA</u> AGTTCAAGACAGATTAGGTCACGG           |
|             | lpr-2c           | TTGGTGGATTACCAGAAGACATGG                               |
| <i>Stl</i>  | SaPIbov att-9cE  | CC <u>GGAATTC</u> ATTGAGTGGGAATAATTATATATAGC           |
|             | SaPIbov1-203mB   | CGCGGATCCCATGGAAGGAGCTGGTCAAATGGC                      |
| <i>Pri</i>  | SaPIbov1-215cB   | CGCGGATCCAATTGTGCCGTAATGTGTTGG                         |
|             | SaPIhor2-12c     | CTTCATCAAATTGATACATAGC                                 |
| <i>Ori</i>  | SaPIhor2-7m      | ATAGTATTAATGGTTACAGAGC                                 |
|             | SaPIbov5-22c     | ATACCCAAATTGTTCTTTAAACTC                               |
| <i>Cos</i>  | SaPIbov5-54mB    | CGCGGATCCTTTCTTCATAACATTTGTTCTATGA                     |
|             | SaPIbov5-14c     | TGTCATAATTATTCTCCTATC                                  |
| <i>scin</i> | SaPIbov5-28mB    | CGCGGATCCAGATAAGCATGATATTAACGGG                        |
|             | SaPIbov5-38cS    | ACGCGT <u>CGACAT</u> TTTTTCATTACCATTAATAAATTTATATACCTG |
| <i>vwb</i>  | SaPIbov5-18m     | ATAGGAGAATAATTATGACATACTAAAAACACCCATTTGGG              |
|             | SaPIbov att-8mH  | CC <u>CAAGCTT</u> TATATATAATTATTCCCACTCAATG            |
| Plasmid     | Oligonucleotides | Sequence (5'-3')                                       |
| pJP1511     | phi12p29-1mB     | CGCGGATCCGGACCGTTGCAAAAAGG                             |
|             | phiSLTp29-2c     | CCTCTATATATTCTTTCAGCTGTTT                              |
|             | phi12p29-3m      | AAACAGCTGAAAGAATATATAGAGGAGAAGAAGGTGGATTCCG            |
|             | phi12p29-4cS     | ACGCGT <u>CGACAT</u> GAATTTTCATCAAAAATGCCC             |

\*Underlined is shown the sequence recognized by the restriction enzymes used.

## References

- Chen J, Novick RP. (2009). Phage-mediated intergeneric transfer of toxin genes. *Science* **323**: 139–141.
- Kreiswirth BN, Löfdahl S, Betley MJ, O'Reilly M, Schlievert PM, Bergdoll MS, et al. (1983). The toxic shock syndrome exotoxin structural gene is not detectably transmitted by a prophage. *Nature* **305**: 709–712.
- Labandeira-Rey M, Labandeira-Rey M, Couzon F, Couzon F, Boisset S, Boisset S, et al. (2007). *Staphylococcus aureus* Panton-Valentine leukocidin causes necrotizing pneumonia. *Science* **315**: 1130–1133.
- Maiques E, Ubeda C, Tormo MA, Ferrer MD, Lasa I, Novick RP, et al. (2007). Role of staphylococcal phage and SaPI integrase in intra- and interspecies SaPI transfer. *J Bacteriol* **189**: 5608–5616.
- Quiles-Puchalt N, Carpena N, Alonso JC, Novick RP, Marina A, Penadés JR. (2014). Staphylococcal pathogenicity island DNA packaging system involving *cos*-site packaging and phage-encoded HNH endonucleases. *Proc Natl Acad Sci USA* **111**: 6016–6021.
- Viana D, Blanco J, Tormo-Más MÁ, Selva L, Guinane CM, Baselga R, et al. (2010). Adaptation of *Staphylococcus aureus* to ruminant and equine hosts involves SaPI-carried variants of von Willebrand factor-binding protein. *Mol Microbiol* **77**: 1583–1594.

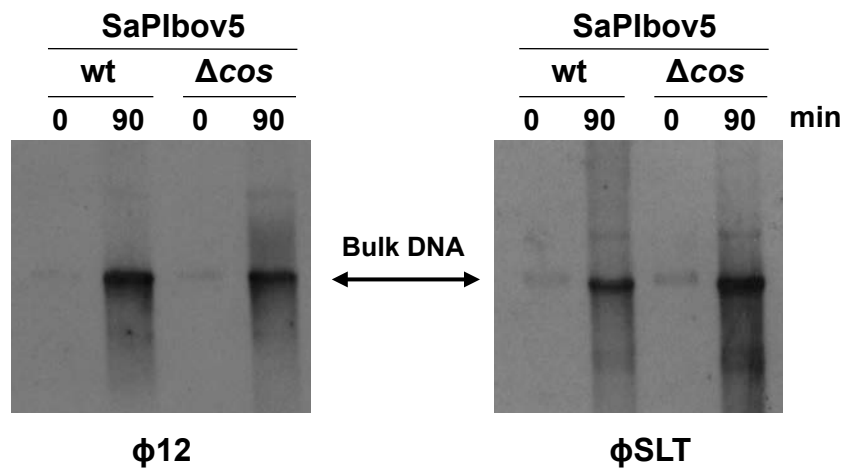

**Supplementary Figure 1** Replication analysis of SaPIbov5  $\Delta cos$ . Southern blot of  $\phi 12$  and  $\phi SLT$  lysates, from strains carrying SaPIbov5 or SaPIbov5  $\Delta cos$ , as indicated. Samples were isolated 0 or 90 min after induction with mitomycin C, separated on agarose and blotted with a SaPIbov5-specific probe. Upper band is 'bulk' DNA, and represents replicating SaPIbov5.

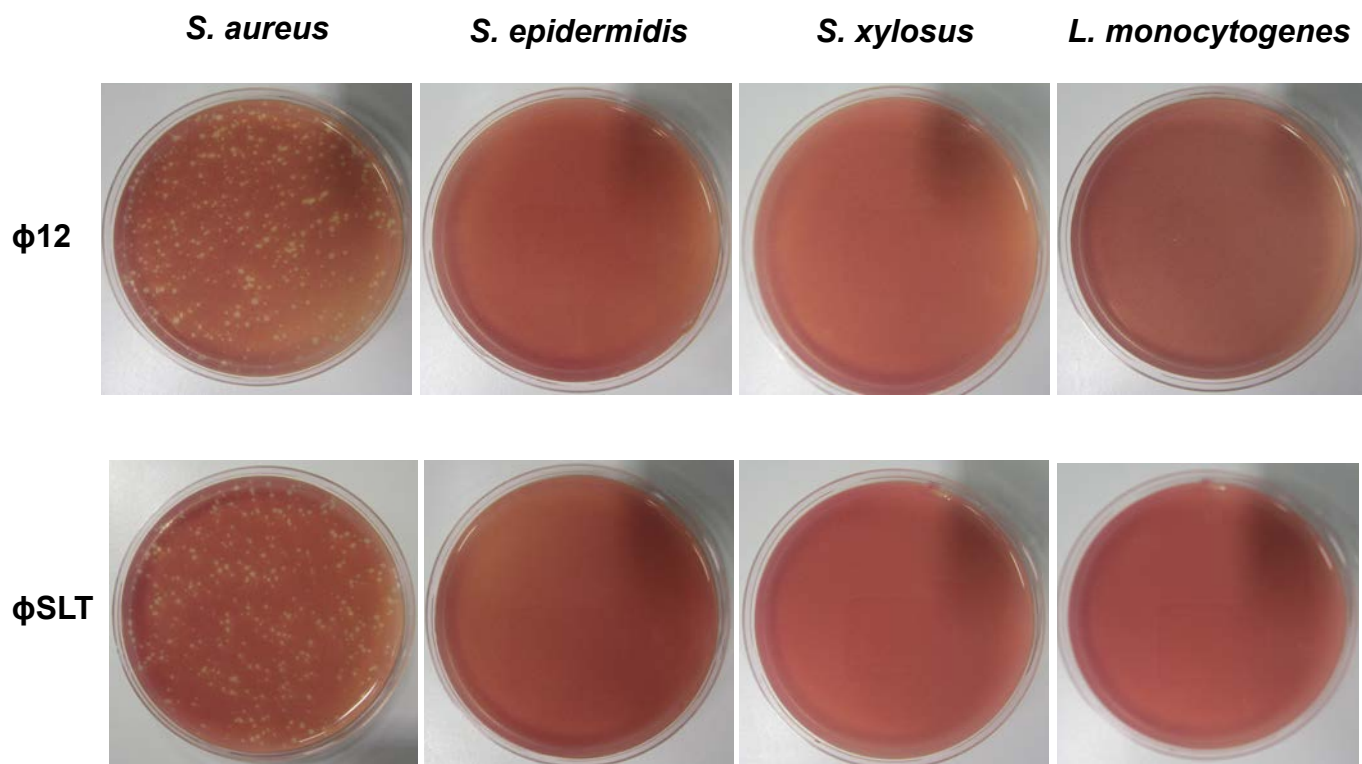

**SupplementaryFigure 2** Efficiency of plating of cos-phages  $\phi 12$  and  $\phi SLT$  against various bacterial species. Approximately  $10^8$  bacteria were infected with 500 p.f.u. of phage  $\phi 12$  (upper panel) or  $\phi SLT$  (lower panel), plated on phage bottom agar, and incubated 24 h at 32 °C. Plates were stained with 0.1% TTC in TSB and photographed.
